# Supplementary material for: Metal-induced regulation of fullerene complexation with double-calix[5]areneElectronic supplementary information (ESI) available: spectroscopic and titration data. See http://www.rsc.org/suppdata/cc/b1/b108121g/
Source: Royal Society of Chemistry journal article supplement (doi:10.1039/b108121g), 2002-02-05
Supplement: b108121g.pdf [file b108121g.pdf]

## Compound 1

$^1\text{H-NMR}$  (300 MHz,  $\text{CDCl}_3$ ): 9.23 (bs, 2H), 9.09 (bs, 2H), 8.86 (bs, 2H), 8.81 (bs, 4H), 8.77 (bs, 4H), 8.50 (d, 2H,  $J=8.0$  Hz), 8.47 (d, 2H,  $J=8.0$  Hz), 8.22 (d, 2H,  $J=8.0$  Hz), 7.97 (dd, 2H,  $J=8.0, 1.8$  Hz), 7.46 (s, 4H), 7.19 (t, 1H,  $J=7.5$  Hz), 7.02 (bs, 4H), 7.00 (bs, 4H), 6.85 (bs, 2H), 6.56 (d,  $J=7.5$  Hz), 6.54 (s, 1H), 4.18 (bs, 4H), 3.92 (m, 4H), 3.60-4.10 (m, 20H), 2.24 (s, 24H).

$^{13}\text{C-NMR}$  (75 MHz,  $\text{CDCl}_3$ ): 165.8, 159.7, 158.4, 153.2, 150.9, 147.81, 147.78, 147.6, 136.8, 135.9, 134.9, 130.9, 130.6, 130.6, 130.3, 129.9, 129.7, 129.6, 129.6, 129.3, 127.82, 127.79, 126.7, 126.5, 126.3, 125.9, 121.5, 120.5, 107.4, 101.7, 66.7, 39.6, 31.5, 31.3, 29.7, 20.43, 20.41.

UV-vis spectra of **1** (solid line) and  $[\mathbf{1}\cdot\text{Cu}^+]\text{PF}_6^-$  (dash) at the concentration of  $1.0 \times 10^{-5}$  mol/L in  $\text{CHCl}_2\text{CHCl}_2$ .

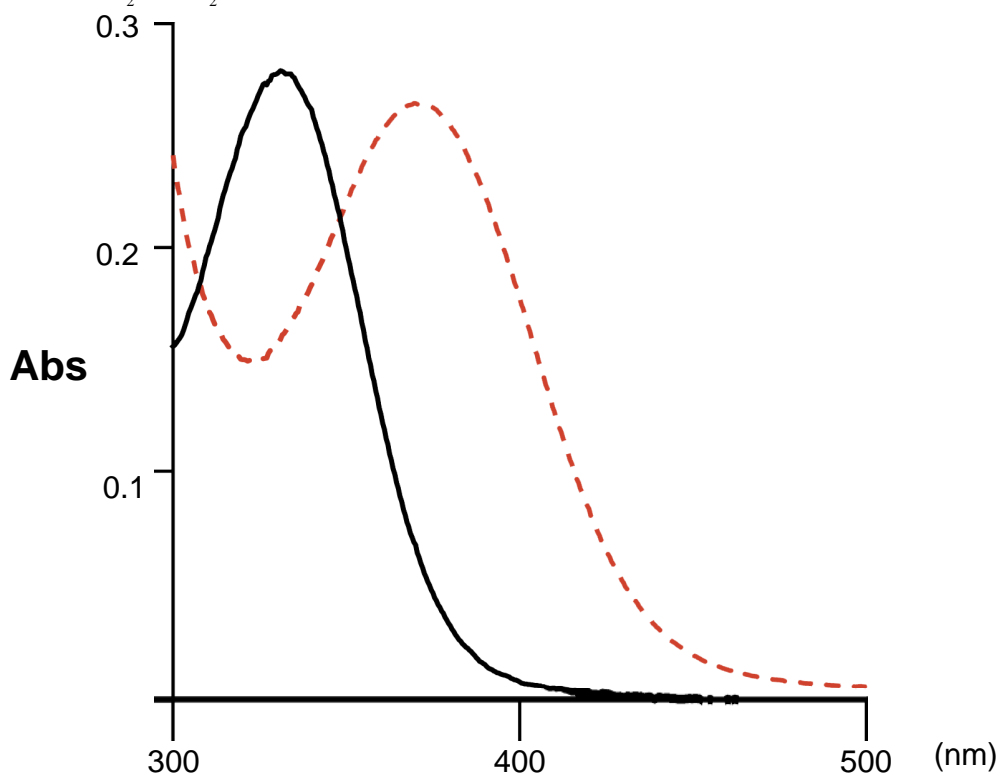

MALDI-TOF MASS spectrum of complex  $[\mathbf{1}\cdot\text{Cu}^+]$

Data: 16Cu0001.1 25-Jan-10 13:39 Cal: T13-Dith-2 9 Nov 10 19:55  
 Kratos Compact MALDI 2 V5.2.2: + Linear High Power: 5, P.Ext @ 1794 (bin 157)  
 %Int. 100% =27 mV[sum= 1358 mV] Profiles 1-50 Smooth Av 10

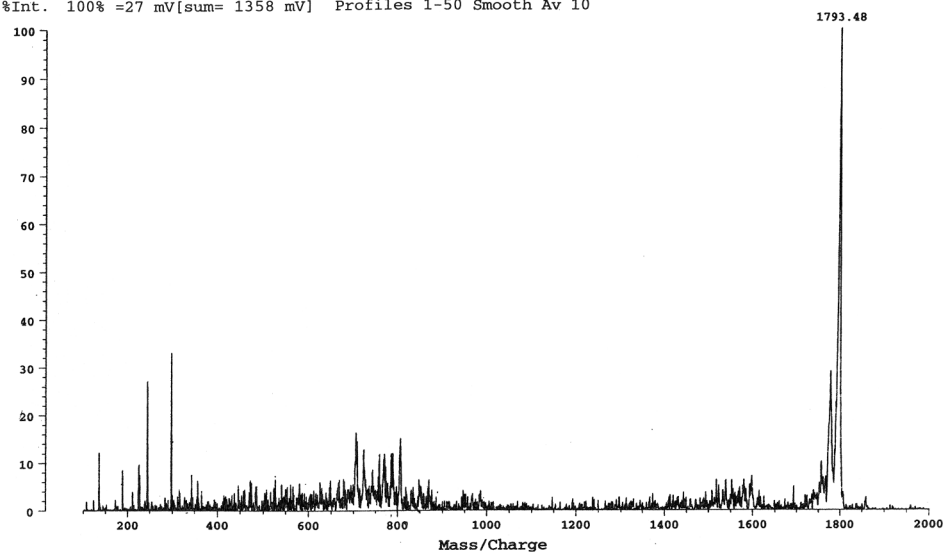

Titration data for C<sub>60</sub> and C<sub>70</sub>

C<sub>60</sub> and **9**

[C<sub>60</sub>]: 4.80X10<sup>-5</sup> mol/L

λ<sub>obs</sub>: 430 nm

| ABS <sub>obs</sub> | [ <b>9</b> ]          |
|--------------------|-----------------------|
| 0.0819             | 6.25X10 <sup>-4</sup> |
| 0.1543             | 1.25X10 <sup>-3</sup> |
| 0.2195             | 1.88X10 <sup>-3</sup> |
| 0.2791             | 2.50X10 <sup>-3</sup> |
| 0.3348             | 3.13X10 <sup>-3</sup> |

C<sub>60</sub> and [**1•Cu<sup>+</sup>**]PF<sub>6</sub><sup>-</sup>

[C<sub>60</sub>]: 1.00X10<sup>-5</sup> mol/L

λ<sub>obs</sub>: 550 nm

| ABS <sub>obs</sub> | [ <b>[1•Cu<sup>+</sup>]PF<sub>6</sub><sup>-</sup></b> ] |
|--------------------|---------------------------------------------------------|
| 0.0057             | 7.75X10 <sup>-5</sup>                                   |
| 0.0090             | 1.55X10 <sup>-4</sup>                                   |
| 0.0111             | 2.33X10 <sup>-4</sup>                                   |
| 0.0139             | 3.10X10 <sup>-4</sup>                                   |
| 0.0154             | 3.88X10 <sup>-4</sup>                                   |

C<sub>70</sub> and **1**

[C<sub>70</sub>]: 1.00X10<sup>-5</sup> mol/L

λ<sub>obs</sub>: 550 nm

| ABS <sub>obs</sub> | [ <b>1</b> ]          |
|--------------------|-----------------------|
| 0.0035             | 1.00X10 <sup>-4</sup> |
| 0.0069             | 2.00X10 <sup>-4</sup> |
| 0.0100             | 3.00X10 <sup>-4</sup> |
| 0.0130             | 4.00X10 <sup>-4</sup> |
| 0.0159             | 5.00X10 <sup>-4</sup> |

C<sub>70</sub> and [**1•Cu<sup>+</sup>**]PF<sub>6</sub><sup>-</sup>

[C<sub>70</sub>]: 1.00X10<sup>-5</sup> mol/L

λ<sub>obs</sub>: 500 nm

| ABS <sub>obs</sub> | ABS <sub>host</sub> | ΔABS    | [ <b>[1•Cu<sup>+</sup>]PF<sub>6</sub><sup>-</sup></b> ] |
|--------------------|---------------------|---------|---------------------------------------------------------|
| 0.1236             | 0.1554              | -0.0318 | 1.05X10 <sup>-4</sup>                                   |
| 0.2382             | 0.3108              | -0.0726 | 2.10X10 <sup>-4</sup>                                   |
| 0.3402             | 0.4662              | -0.1260 | 3.15X10 <sup>-4</sup>                                   |
| 0.4293             | 0.6216              | -0.1923 | 4.20X10 <sup>-4</sup>                                   |
| 0.5109             | 0.7770              | -0.2661 | 5.25X10 <sup>-4</sup>                                   |
